# Supplementary material
Source: Springer Nature journal article supplement (https://www.springermedizin.de/resource/supplementary/12883_2009_289_MOESM1_ESM.pdf/9455228)

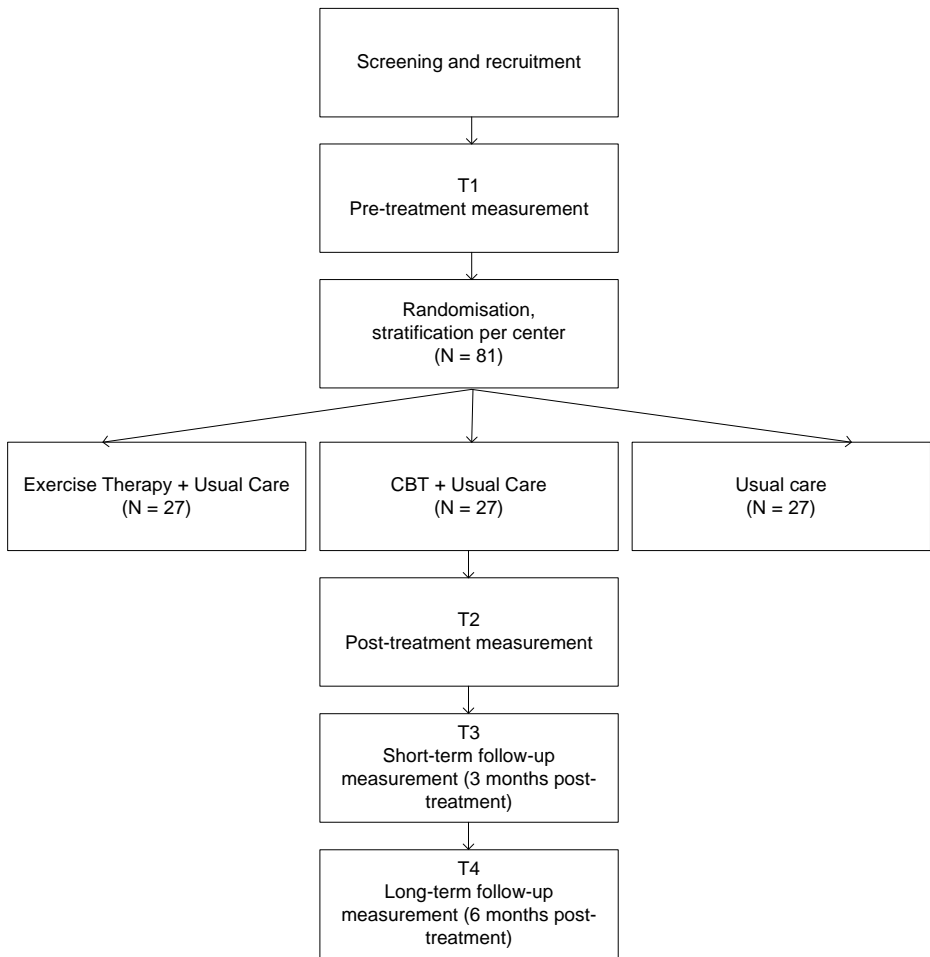

Supplement: MOESM1 [file 9455228]
